# Supplementary material for: Auditory cortical activity drives feedback-dependent vocal control in marmosets
Source: PubMed Central journal article supplement (PMC6026141; doi:10.1038/s41467-018-04961-8), 2018-06-29
Supplement: 41467_2018_4961_MOESM1_ESM.pdf [file 41467_2018_4961_MOESM1_ESM.pdf]

**Supplementary Information**

**Auditory cortical activity drives feedback-dependent vocal control in marmosets**

Eliades et al.

## **Supplementary Note 1**

Details regarding sample sizes, p-values, and statistical tests of individual figure panels are detailed below.

**Fig. 1d.** All n values represent number of vocalizations. Analyses were parametric ANOVAs with Bonferroni corrections. Expected (mean) frequency changes during normal conditions were subtracted from individual samples prior to averaging.

m96z trill: n=[7513, 4074, 3976] (normal/-2/+2); means:  $0 \pm 36.8$ ,  $30.2 \pm 42.4$ ,  $-38.4 \pm 35.0$  (mean $\pm$ sd); F=33.08, p=4.6E-15, all pairwise p < 0.001.

m96z trillphee: n=[3528, 1939, 2600]; means:  $0 \pm 27.9$ ,  $84.3 \pm 34.9$ ,  $046,1 \pm 33.7$ ; F=95.52, p=9.99E-42, all pairwise p < 0.001.

mm058 trill: n= [1415, 1004, 504]; means:  $0 \pm 27.9$ ,  $84.1 \pm 30.5$ ,  $-54.3 \pm 29.1$ ; F=44.30, p=1.12E-19, all pairwise p < 0.001.

mm058 trillphee: n=[1389, 710, 1152]; means:  $0 \pm 27.6$ ,  $63.0 \pm 36.4$ ,  $-42.1 \pm 34.5$ ; F=23.45, p=7.78E-11, all pairwise p < 0.001 save normal vs. +2 where p=0.003.

**Fig 1e.** Vocal sample sizes: normal: 11,159, -2ST: 11,984, +2ST: 11,533.

**Fig 2a.** Firing rates  $-10.2 \pm 6.4$  spk/s (mean $\pm$ sd, normal),  $-9.5 \pm 6.7$  (amplified),  $-6.5 \pm 4.8$  (+2ST). N=355 (vocalizations), Chi-squared=26.6, p=1.7E-6 (Kruskal-Wallis), pairwise comparisons p-values: 0.43 (normal vs. amp), <0.001 (norm vs +2), <0.001 (amp vs. +2).

**Fig. 2b.** Number of units +2ST: 608, -2ST: 638

**Fig. 3a.** Firing rates  $-8.8 \pm 6.9$  spk/s (normal),  $-7.8 \pm 7.0$  (amplified),  $-4.4 \pm 6.2$  (-2ST). N=455 (vocalizations), Chi-squared=28.0,  $p=8.5E-7$  (Kruskall-Wallis), pairwise comparisons p-values: 0.63 (normal vs. amp),  $<0.001$  (norm vs -2),  $<0.001$  (amp vs. -2).

**Fig 3c.** Pearson correlation coefficient  $r=0.624$ ,  $p<0.001$  (N=28 vocalizations), Bottom:

**Fig 3d.** Pearson correlation coefficients,  $p<0.05$  indicated (N=88 normal, 233 amplified, 136 -2ST).

**Fig 4a.** Indicated N values are number of units. Indicated values for  $p<0.05$  (Wilcoxon signed-rank tests with FDR corrections).

**Fig. 4b.** Unit numbers as in Fig4a. Shaded significance ( $p<0.05$ ) for individual units (Wilcoxon signed-rank). Mean and standard deviation are indicated.

**Fig. 4c & d.** Indicated values for  $p<0.05$  as in Fig 4a.

**Fig. 5.** N=479 units (-2ST), 512 (+2ST) . Indicated values for  $p<0.05$  (from Pearson correlations with FDR corrections).

**Fig. 6a.** +2ST RMI change:  $0.24 \pm 0.31$ , mean $\pm$ std; N=638,  $z=23.3$ ,  $p<0.001$ , Wilcoxon signed-rank. -2ST:  $0.27 \pm 0.37$ ; N=608,  $z=23.8$ ,  $p<0.001$ . N is number of units.

**Fig. 6b.** Number of units as in Fig 6a. Pearson correlations: +2ST ( $r=-0.53$ ,  $p<0.001$ ) and -2ST ( $r=-0.53$ ,  $p<0.001$ ).

**Fig. 6c.** Number of units as in Fig 6a. Pearson correlations: +2ST ( $r=-0.02$ ,  $p=0.65$ ) and -2ST ( $r=0$ ,  $p=0.97$ ).

**Fig. 6d.** Pearson correlations for absolute value vocal correlation coefficients vs. RMI:  $r=-0.02$  ( $p=0.41$ ) for all data, and  $r=-0.04$  ( $p=0.77$ ) for only significant units.

**Fig. 6g.** Number of units as in Fig 6a. Left hemisphere change:  $0.26\pm 0.40$ , Right hemisphere:  $0.30\pm 0.44$  ( $z=2.40$ ,  $p=0.016$ , Wilcoxon rank-sum).

**Fig. 6h.** Number of units as in Fig 6a. Left hemisphere correlation:  $0.19\pm 0.17$ , Right hemisphere:  $0.20\pm 0.44$  ( $z=0.21$ ,  $p=0.84$ , Wilcoxon rank-sum).

**Fig. 7b.** Median 38.5ms, IQR: 29.6-51.7ms

**Fig. 7f.** P-values for individual plots determined using Wilcoxon signed-rank tests for each electrode comparing median frequency changes from baseline.

**Fig. 8.** P-values for individual plots determined using Wilcoxon signed-rank tests for each electrode comparing median frequency changes from baseline.

**Fig. 9a.**  $N=32$  electrodes (left), 46 (right).  $z=2.57$ ,  $p=0.010$  (Wilcoxon rank-sum between hemispheres). Multivariate linear regression using factors: animal, hemisphere, row, and column showed overall  $R^2=0.12$ ,  $F=2.54$ ,  $p=0.047$ . Individual p-values were, respectively: 0.38, 0.004, 0.46, and 0.48.

**Fig. 9b.**  $N$  as in Fig.9a. Total:  $r=0.36$ ,  $p=0.001$  (Spearman), LH:  $r=0.07$ ,  $p=0.70$ , RH:  $r=0.41$ ,  $p=0.005$ .

**Fig. 9c.**  $N$  as in Fig.9a. Total:  $r=-0.37$ ,  $p=0.001$  (Spearman), LH:  $r=-0.27$ ,  $p=0.14$ , RH:  $r=-0.36$ ,  $p=0.016$ .

**Fig. 9d.** N as in Fig.9a. Total:  $r=0.38$ ,  $p=0.001$  (Spearman), LH:  $r=0.28$ ,  $p=0.13$ , RH:  $r=0.34$ ,  $p=0.022$ .

**Fig. 9e.** Trill mean frequency:  $6.95 \pm 0.80$  kHz (mean $\pm$ sd). Shaded area is 95% confidence interval for shuffled estimation of CF tuning (see Methods).
